# Supplementary material for: Systematic interactome mapping of acute lymphoblastic leukemia cancer gene products reveals EXT-1 tumor suppressor as a Notch1 and FBWX7 common interactor
Source: Springer Nature journal article supplement (doi:10.1186/s12885-016-2374-2), 2016-05-26

**Figure S4**

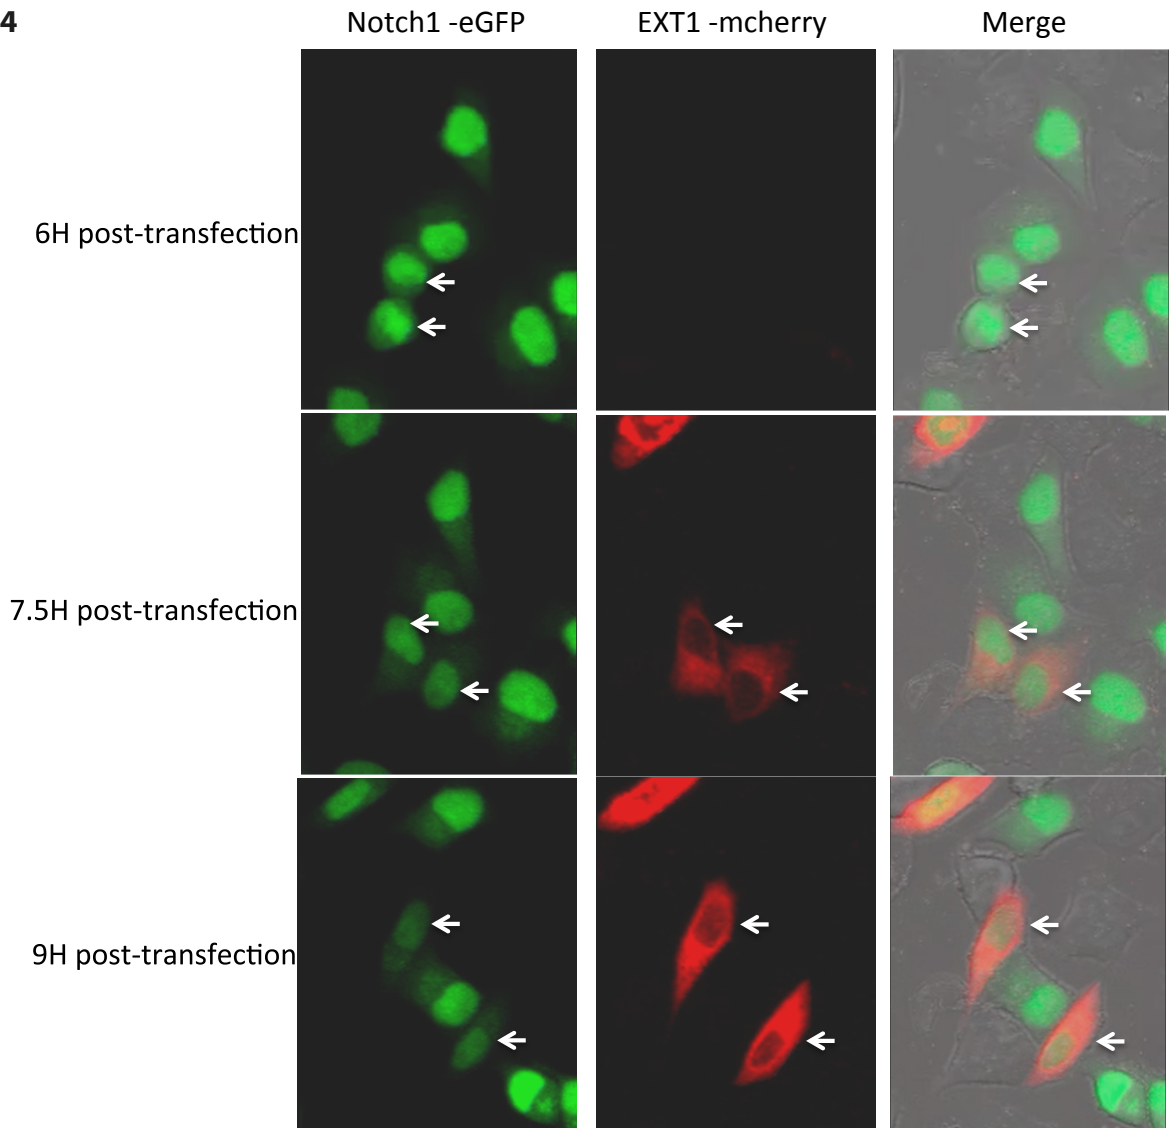

Supplement: MOESM5 [file 10206028]
